# Supplementary material for: Plasma level and expression of visfatin in the porcine hypothalamus during the estrous cycle and early pregnancy
Source: PubMed Central journal article supplement (PMC8062436; doi:10.1038/s41598-021-88103-z), 2021-04-22

# Plasma level and expression of visfatin in the porcine hypothalamus during the estrous cycle and early pregnancy

Tadeusz Kaminski, Marta Kiezun, Ewa Zaobidna, Kamil Dobrzyn, Barbara Wasilewska, Ewa Mlyczynska, Edyta Rytelowska, Katarzyna Kisielewska, Marlena Gudelska, Kinga Bors, Grzegorz Kopij, Karolina Szymanska, Barbara Kaminska, Agnieszka Rak and Nina Smolinska

## MBH

## VISFATIN

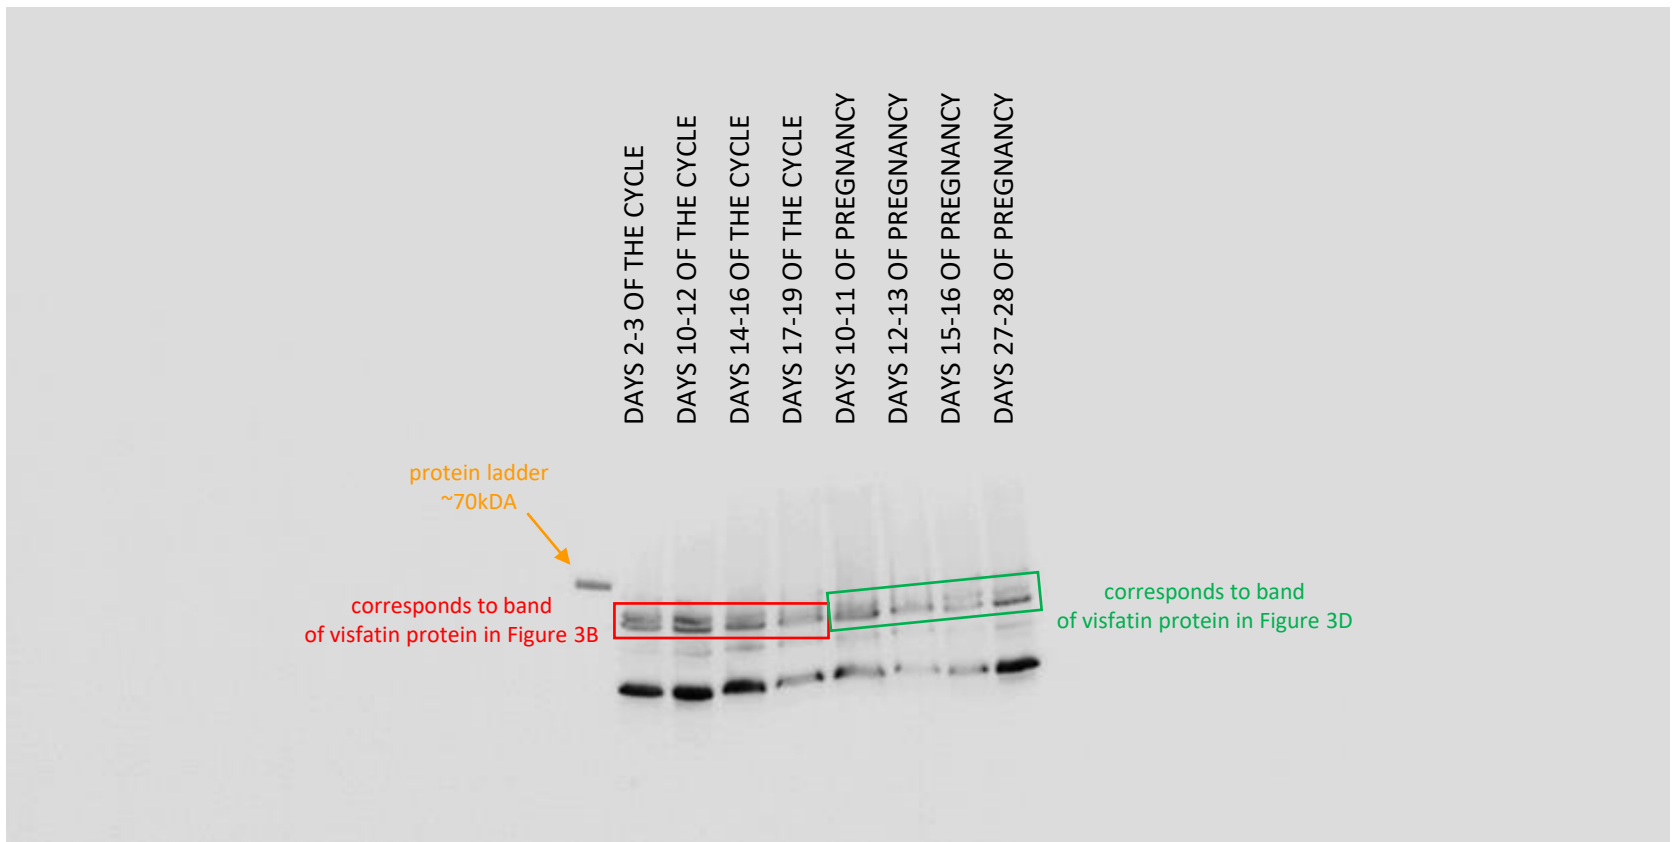

# Plasma level and expression of visfatin in the porcine hypothalamus during the estrous cycle and early pregnancy

Tadeusz Kaminski, Marta Kiezun, Ewa Zaobidna, Kamil Dobrzyn, Barbara Wasilewska, Ewa Mlyczynska, Edyta Rytelewska, Katarzyna Kisielewska, Marlena Gudelska, Kinga Bors, Grzegorz Kopij, Karolina Szymanska, Barbara Kaminska, Agnieszka Rak and Nina Smolinska

**MBH**

**ACTIN**

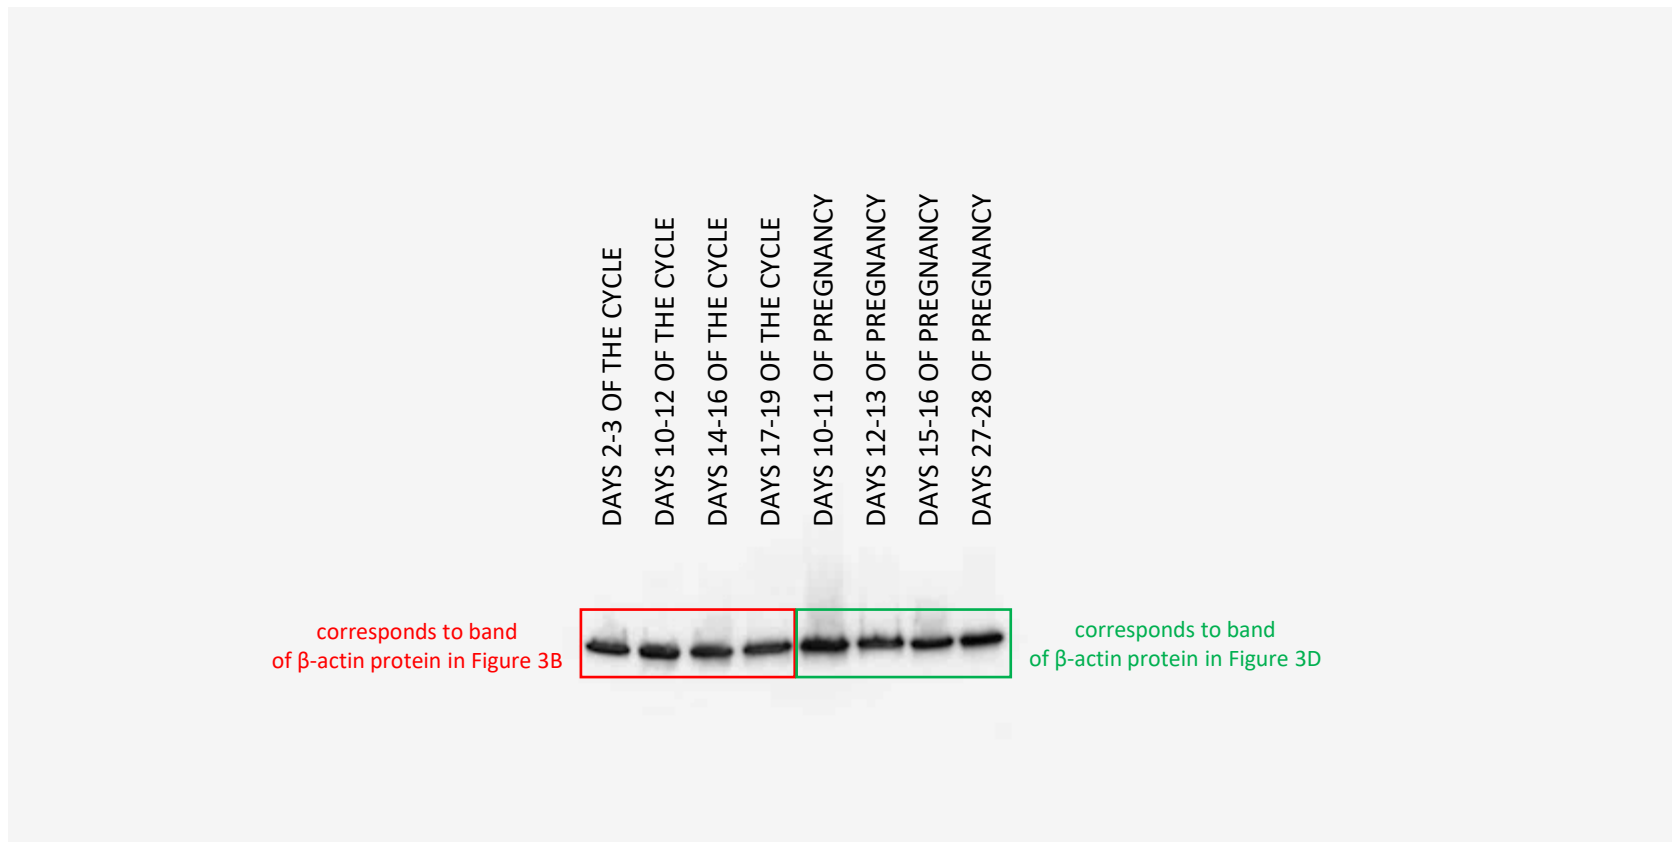

# Plasma level and expression of visfatin in the porcine hypothalamus during the estrous cycle and early pregnancy

Tadeusz Kaminski, Marta Kiezun, Ewa Zaobidna, Kamil Dobrzyn, Barbara Wasilewska, Ewa Mlyczynska, Edyta Rytelewska, Katarzyna Kisielewska, Marlena Gudelska, Kinga Bors, Grzegorz Kopij, Karolina Szymanska, Barbara Kaminska, Agnieszka Rak and Nina Smolinska

**MBH**

**VISFATIN**

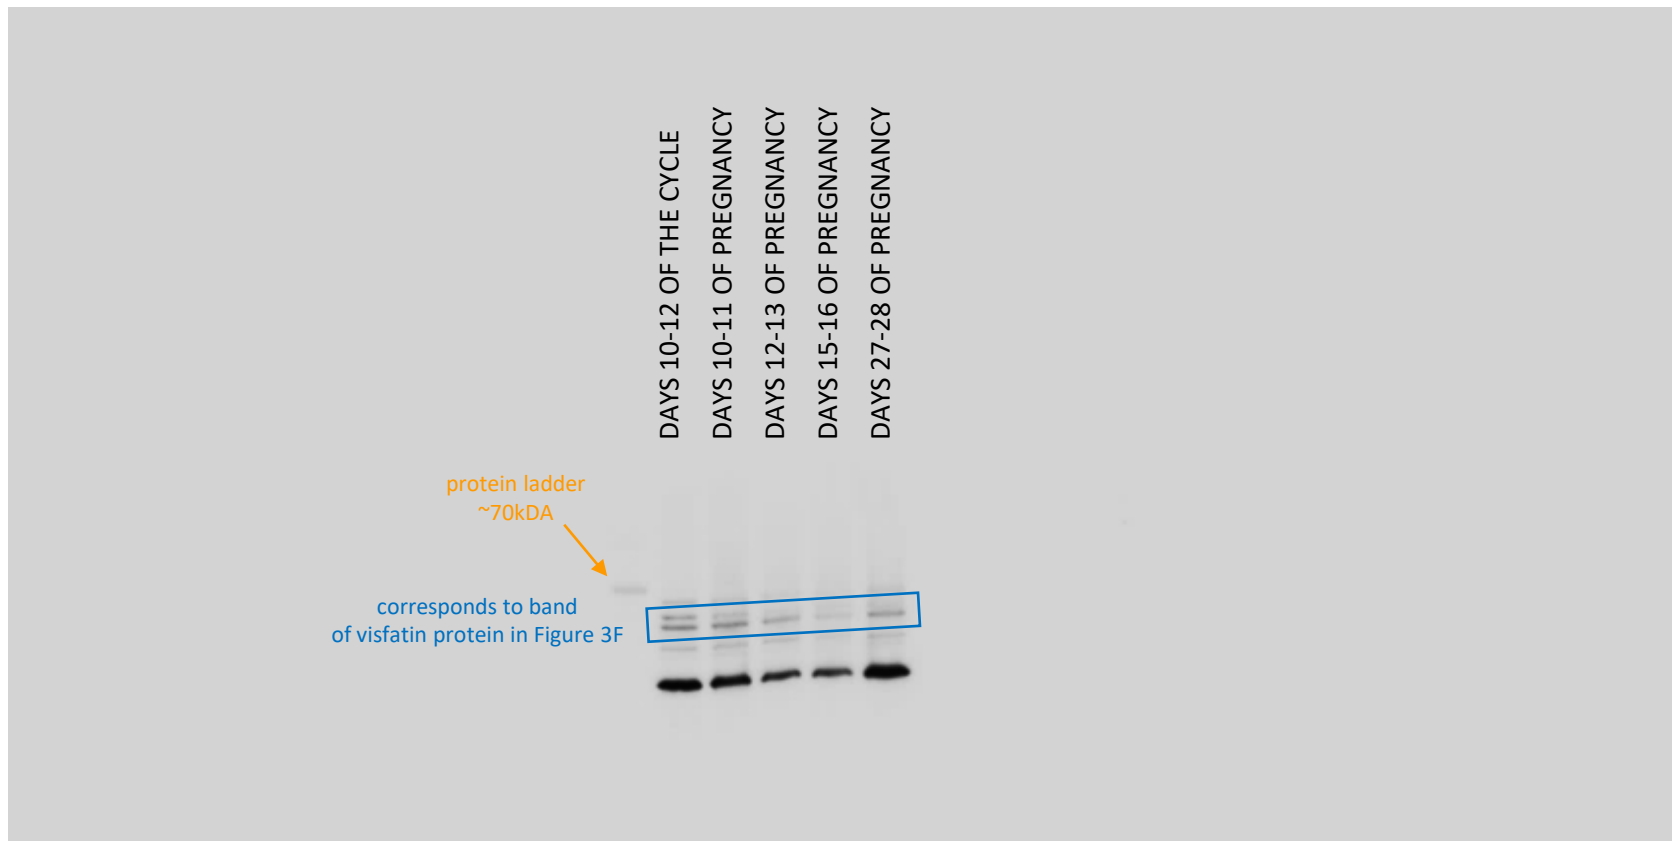

## Plasma level and expression of visfatin in the porcine hypothalamus during the estrous cycle and early pregnancy

Tadeusz Kaminski, Marta Kiezun, Ewa Zaobidna, Kamil Dobrzyn, Barbara Wasilewska, Ewa Mlyczynska, Edyta Rytelewska, Katarzyna Kisielewska, Marlena Gudelska, Kinga Bors, Grzegorz Kopij, Karolina Szymanska, Barbara Kaminska, Agnieszka Rak and Nina Smolinska

**MBH**

**ACTIN**

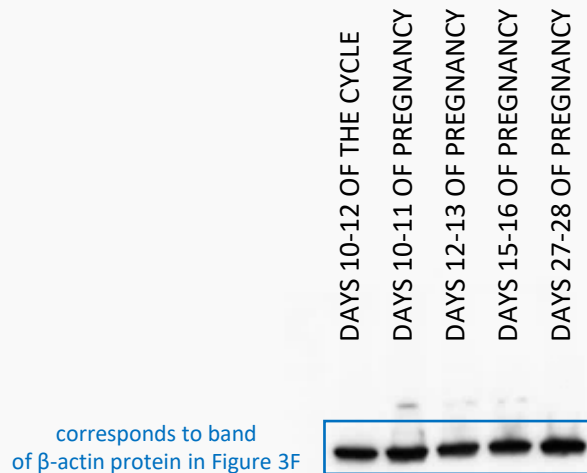

# Plasma level and expression of visfatin in the porcine hypothalamus during the estrous cycle and early pregnancy

Tadeusz Kaminski, Marta Kiezun, Ewa Zaobidna, Kamil Dobrzyn, Barbara Wasilewska, Ewa Mlyczynska, Edyta Rytelewska, Katarzyna Kisielewska, Marlena Gudelska, Kinga Bors, Grzegorz Kopij, Karolina Szymanska, Barbara Kaminska, Agnieszka Rak and Nina Smolinska

**POA**

**VISFATIN**

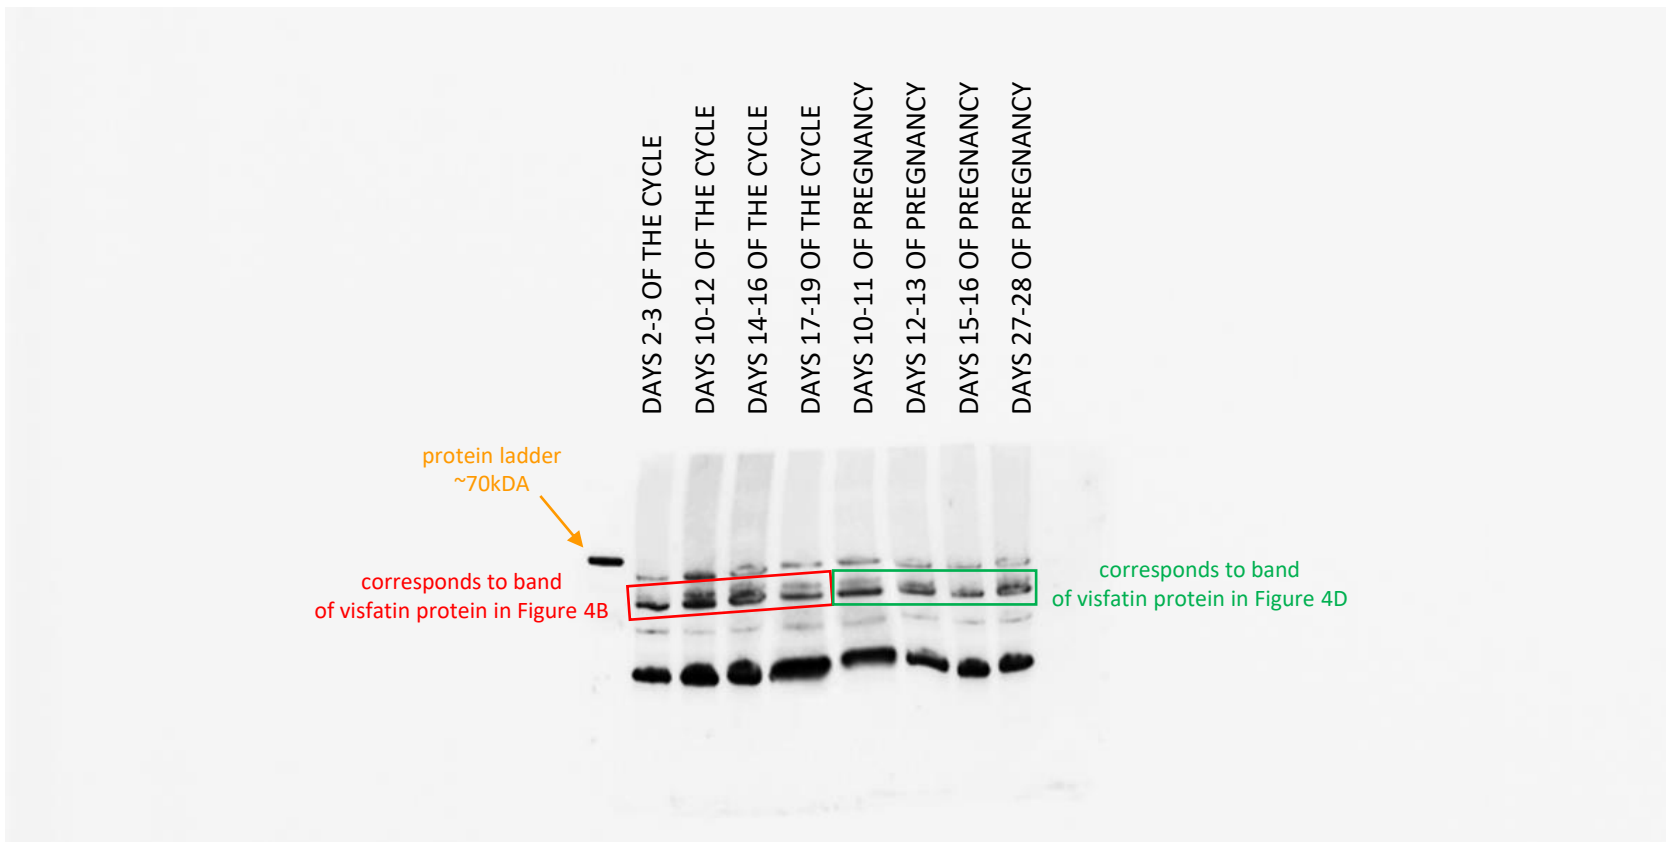

# Plasma level and expression of visfatin in the porcine hypothalamus during the estrous cycle and early pregnancy

Tadeusz Kaminski, Marta Kiezun, Ewa Zaobidna, Kamil Dobrzyn, Barbara Wasilewska, Ewa Mlyczynska, Edyta Rytelewska, Katarzyna Kisielewska, Marlena Gudelska, Kinga Bors, Grzegorz Kopij, Karolina Szymanska, Barbara Kaminska, Agnieszka Rak and Nina Smolinska

**POA**

**ACTIN**

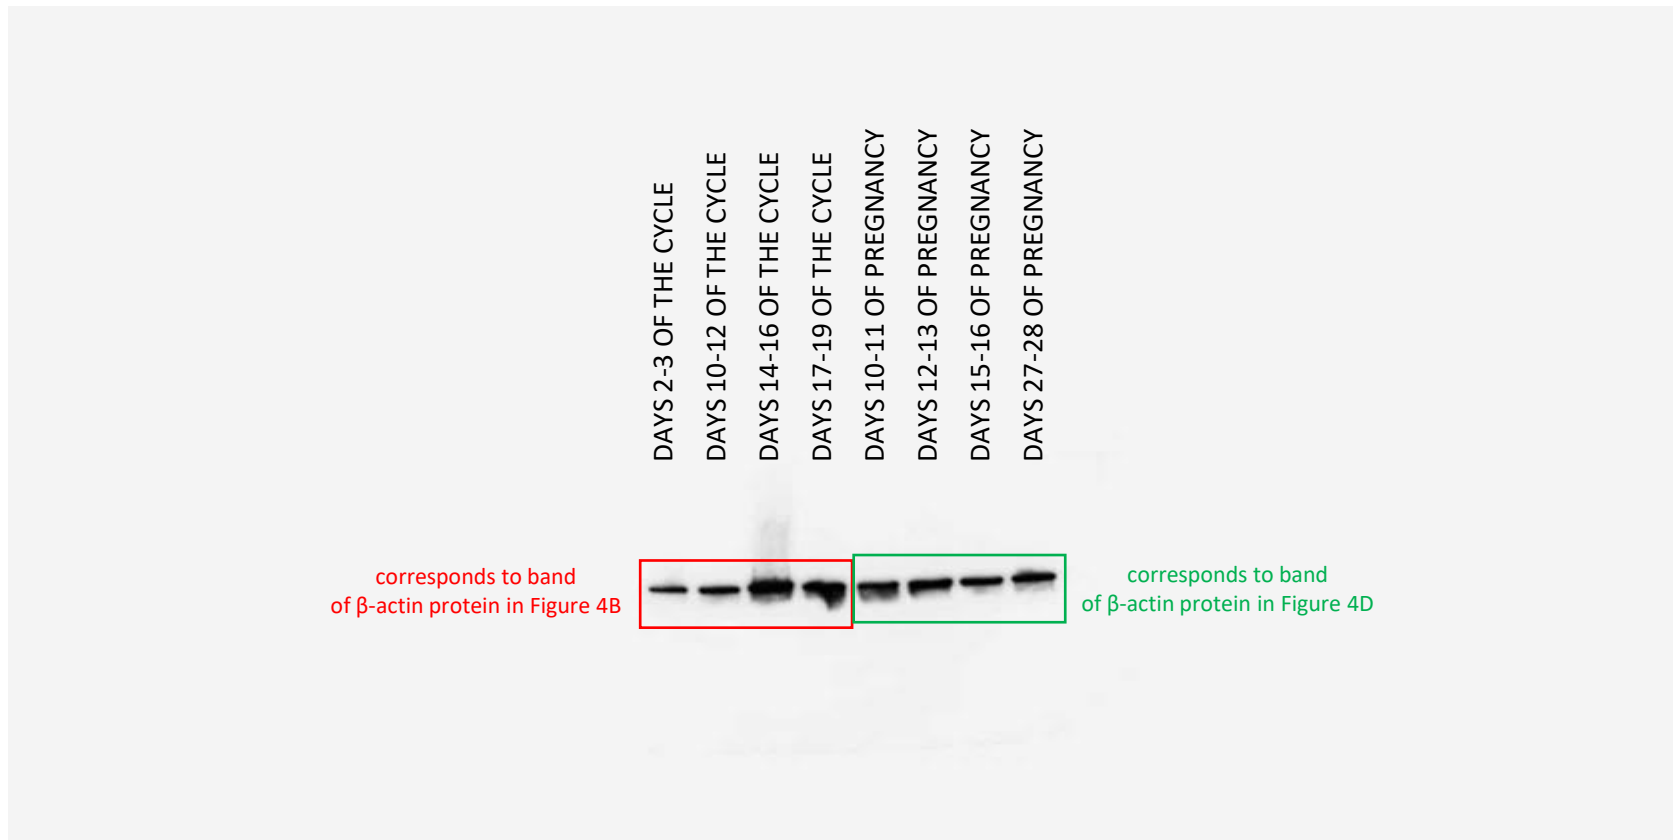

# Plasma level and expression of visfatin in the porcine hypothalamus during the estrous cycle and early pregnancy

Tadeusz Kaminski, Marta Kiezun, Ewa Zaobidna, Kamil Dobrzyn, Barbara Wasilewska, Ewa Mlyczynska, Edyta Rytelewska, Katarzyna Kisielewska, Marlena Gudelska, Kinga Bors, Grzegorz Kopij, Karolina Szymanska, Barbara Kaminska, Agnieszka Rak and Nina Smolinska

**POA**

**VISFATIN**

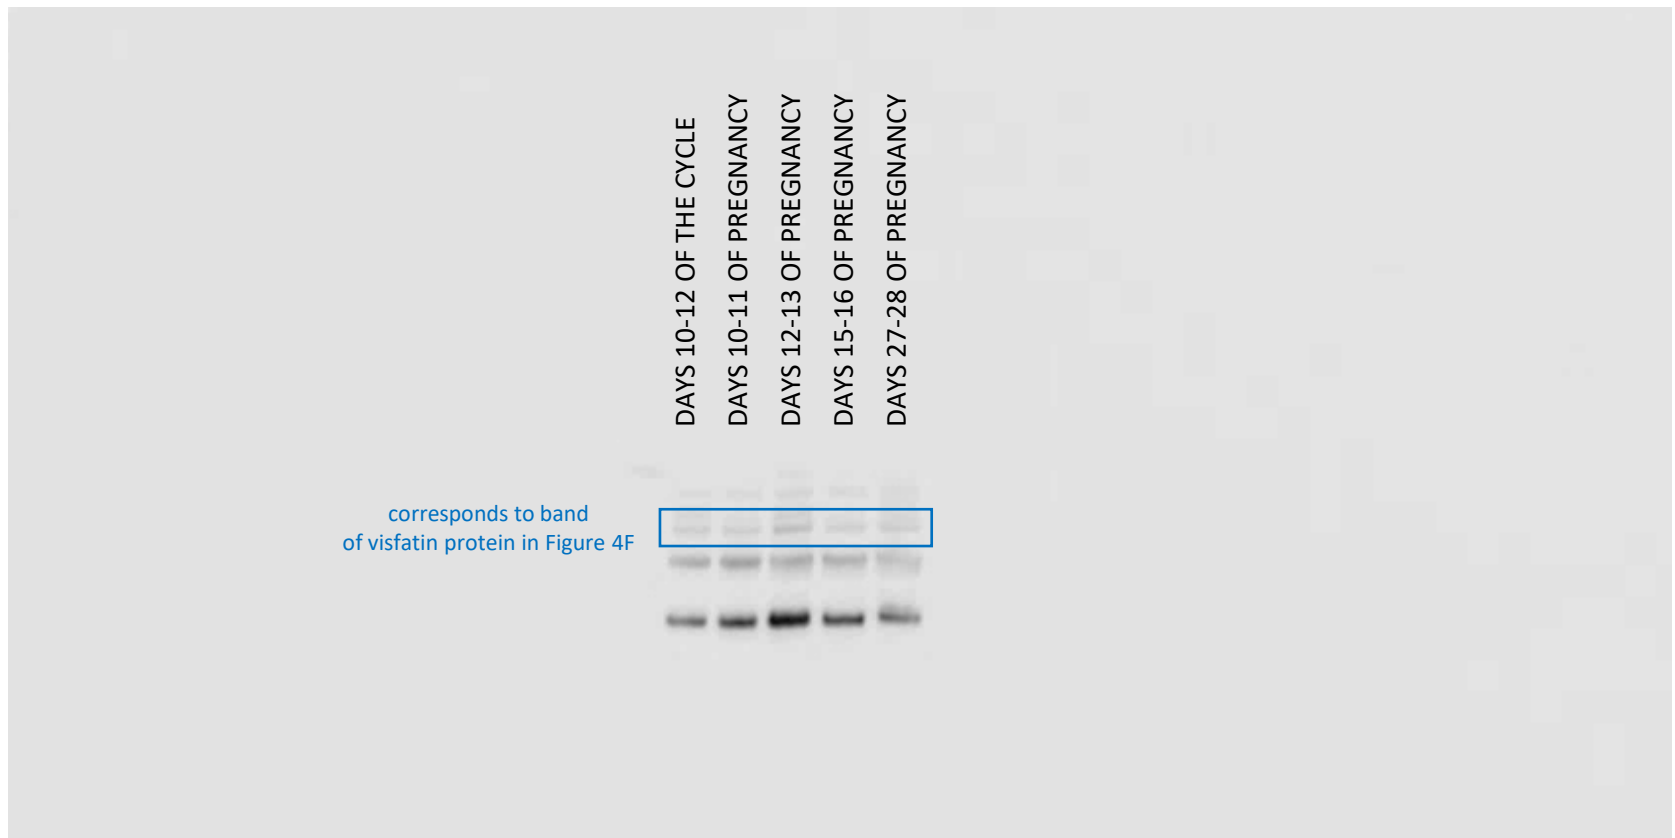

## Plasma level and expression of visfatin in the porcine hypothalamus during the estrous cycle and early pregnancy

Tadeusz Kaminski, Marta Kiezun, Ewa Zaobidna, Kamil Dobrzyn, Barbara Wasilewska, Ewa Mlyczynska, Edyta Rytelowska, Katarzyna Kisielewska, Marlena Gudelska, Kinga Bors, Grzegorz Kopij, Karolina Szymanska, Barbara Kaminska, Agnieszka Rak and Nina Smolinska

**POA**

**ACTIN**

DAYS 10-12 OF THE CYCLE  
DAYS 10-11 OF PREGNANCY  
DAYS 12-13 OF PREGNANCY  
DAYS 15-16 OF PREGNANCY  
DAYS 27-28 OF PREGNANCY

corresponds to band  
of  $\beta$ -actin protein in Figure 4F

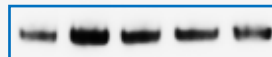

Supplement: 41598_2021_88103_MOESM1_ESM.pdf [file 41598_2021_88103_MOESM1_ESM.pdf]
